# Supplementary material for: JNK Acts as A Conserved Regulator Prevents Healthy Aging by Attenuating Proteostasis Stress During Aging
Source: Research Square preprint supplement (doi:10.21203/rs.3.rs-6316187/v1), 2025-03-28
Supplement: Supplementary file 1 [file 8840cfcf076fb310cf79429e.docx]

**Supplementary material**

**Supplementary Figures**

**
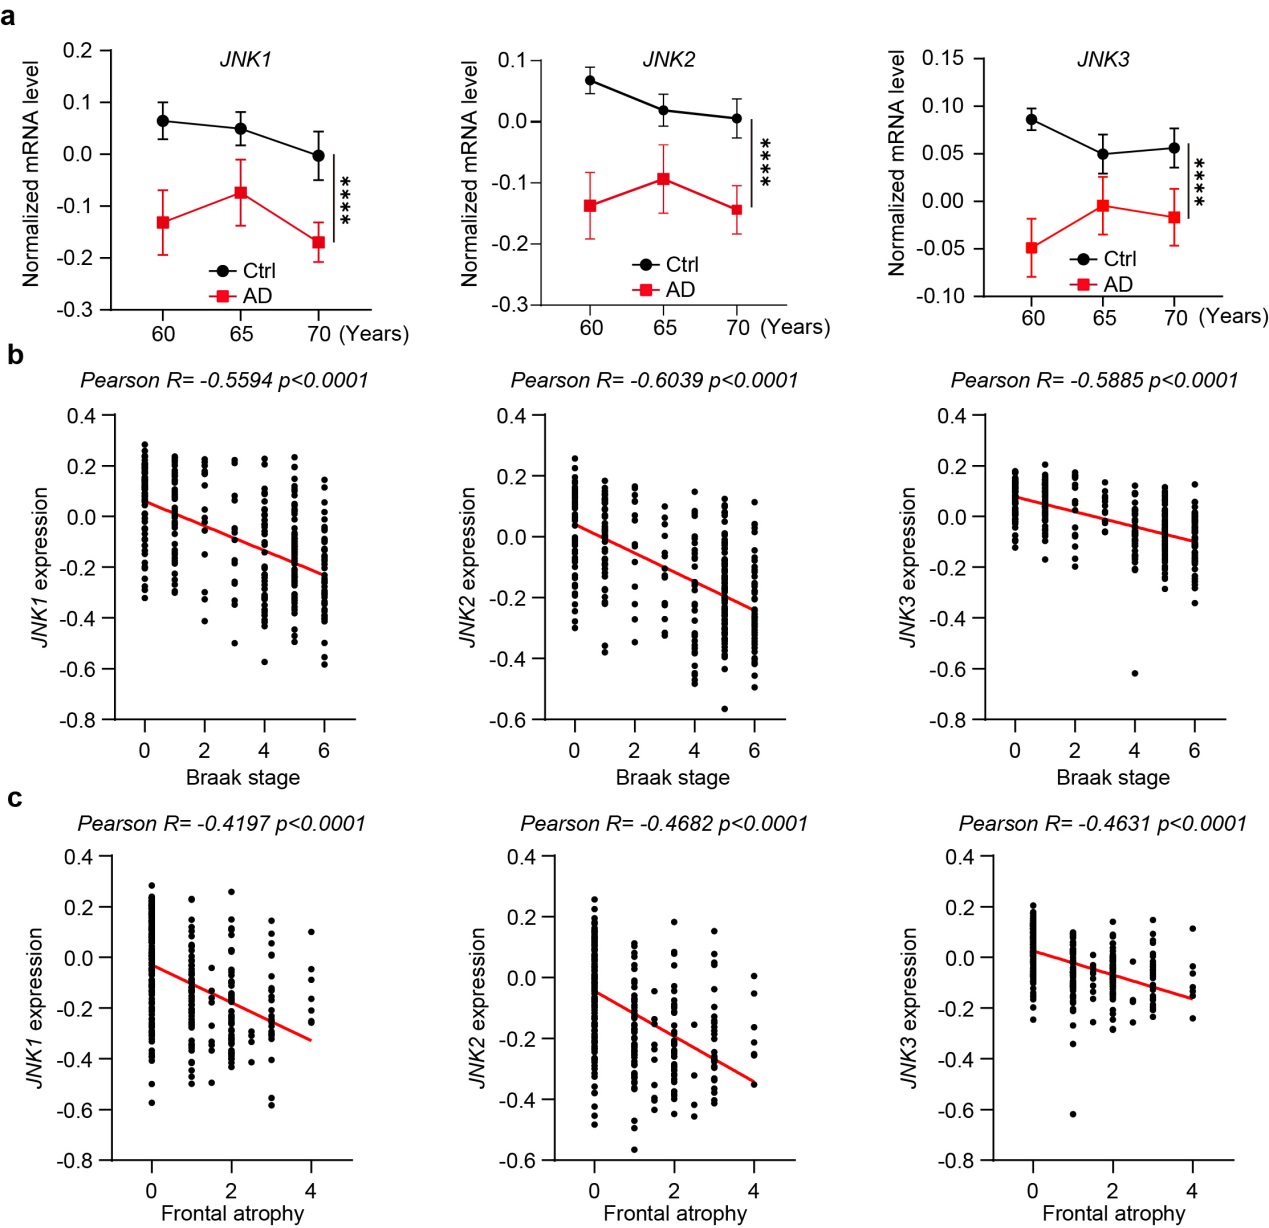
**

**Fig.S1 The mRNA expression levels of JNK1/JNK2/JNK3 negatively correlate with the progression of Alzheimer’s disease (AD) in humans, related to** **Figure 1**

**a,** Comparative analysis of *JNK1* (left panel), *JNK2* (middle panel), and *JNK3* (right panel) mRNA expression levels in the prefrontal cortex between Alzheimer's disease patients (n=32) and age-matched healthy controls (n=50). **b,** Correlation analysis of JNK isoforms mRNA expression with neuropathological progression, showing *JNK1* (left), *JNK2* (middle), and *JNK3* (right) expression patterns across different Braak stages in AD prefrontal cortex samples. **c,** Association between JNK isoforms mRNA expression and disease severity, demonstrating *JNK1* (left), *JNK2* (middle), and *JNK3* (right) expression levels at varying stages of frontal atrophy in AD prefrontal cortex. For panels b and c, gene expression data (n = 360 samples) were obtained from the GEO dataset GSE44772. Statistical significance was determined using Pearson's correlation coefficient (r). All data are represented as mean ± SEM; *****p* < 0.001.

**
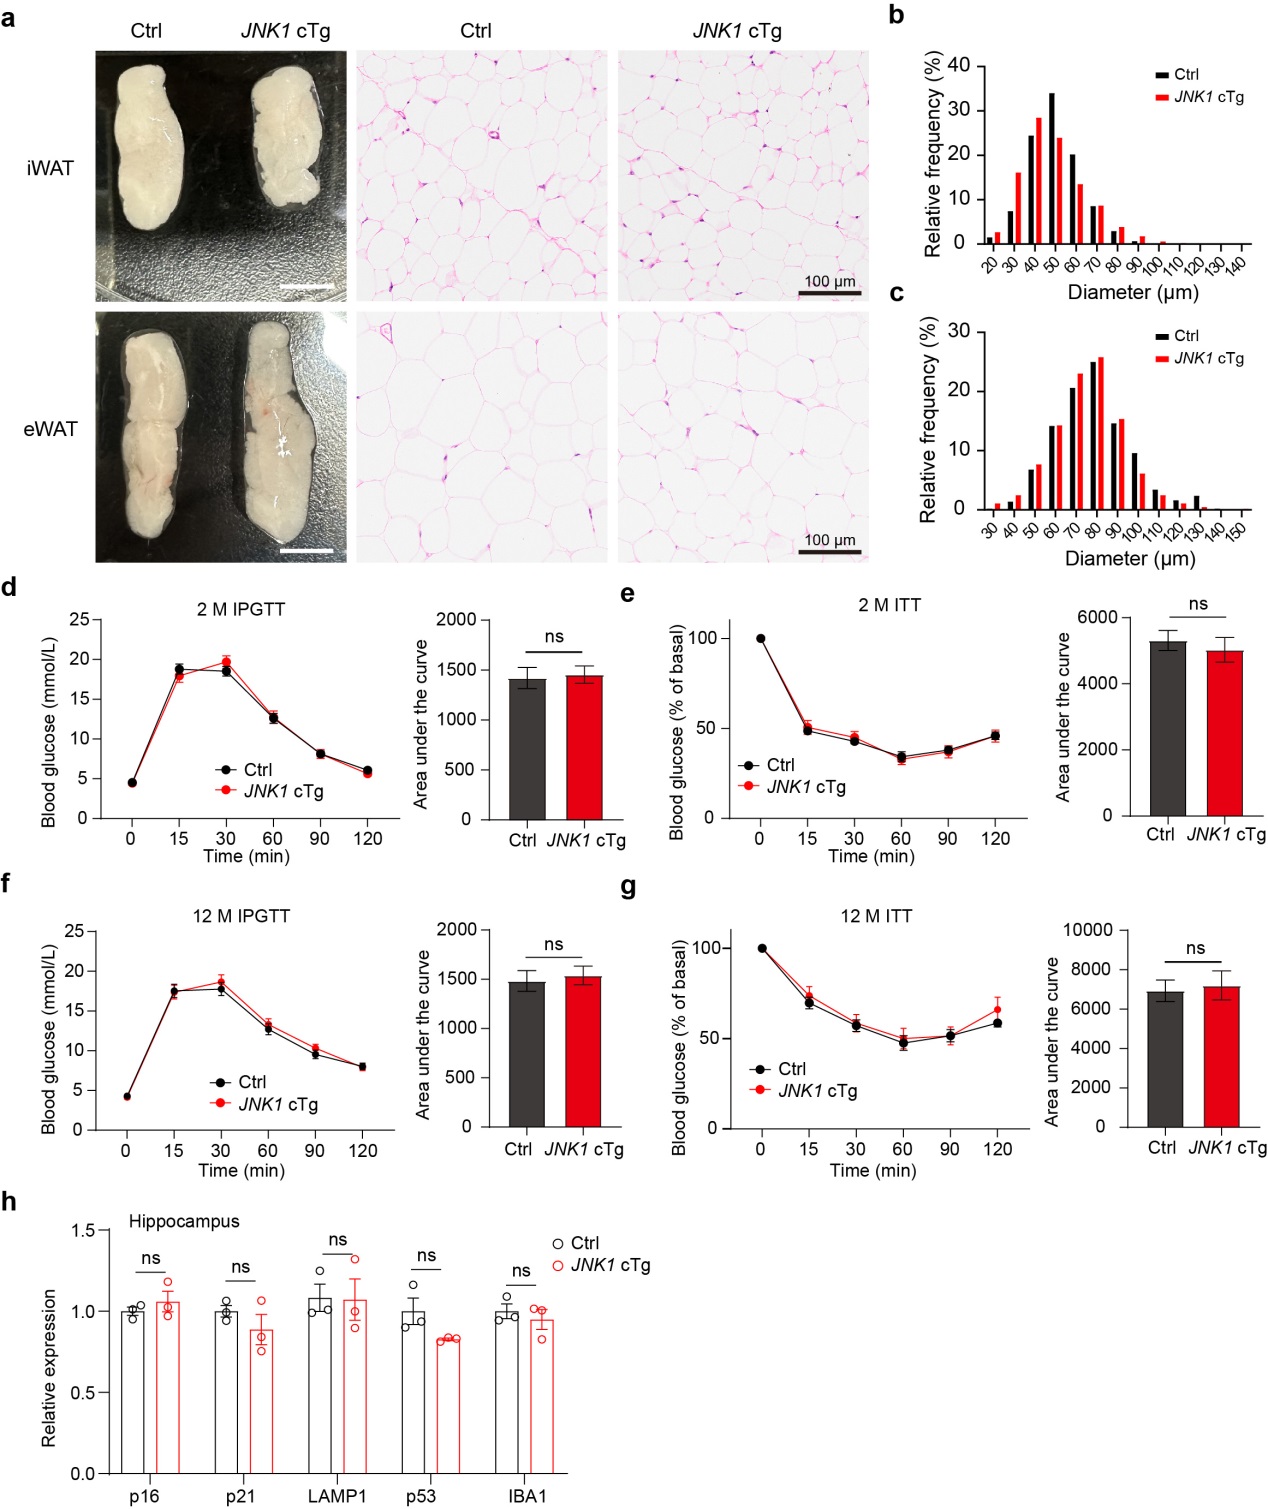
**

**Fig.S2** **JNK activation didn’t affect insulin sensitivity or glucose tolerance in *JNK1* cTg mice, related to Figure 2**

**a**, HE staining of inguinal white adipose tissue (iWAT) and epididymal white adipose (eWAT) tissue in 9-month-old *JNK1* cTg and Ctrl mice, Scale bar, 100 μm. **b, c,** Frequency distribution histogram of iWAT and eWAT cell diameters. **d, e**, Intraperitoneal glucose tolerance test (IPGTT) and receiver operating characteristic curve (AUC) analysis for 2-month-old (c) and 12-month-old (e) *JNK1* cTg and control mice (Ctrl: n = 17; *JNK1* cTg: n = 17). **f, g,** Insulin tolerance test (ITT) and AUC analysis for 2-month-pld (d) and 12-month-old (f) *JNK1* cTg and control mice (Ctrl: n = 17; *JNK1* cTg: n = 12). (h) RT-qPCR analysis of mRNA expression of *Lamp1*, *Trp53*, *Cdkn2a*, *Iba1*, and *Cdkn1a*expression in the hippocampal tissues of the *JNK1* cTg and Ctrl mice. All data are represented as mean ± SEM, n.s. *p* > 0.05.

**
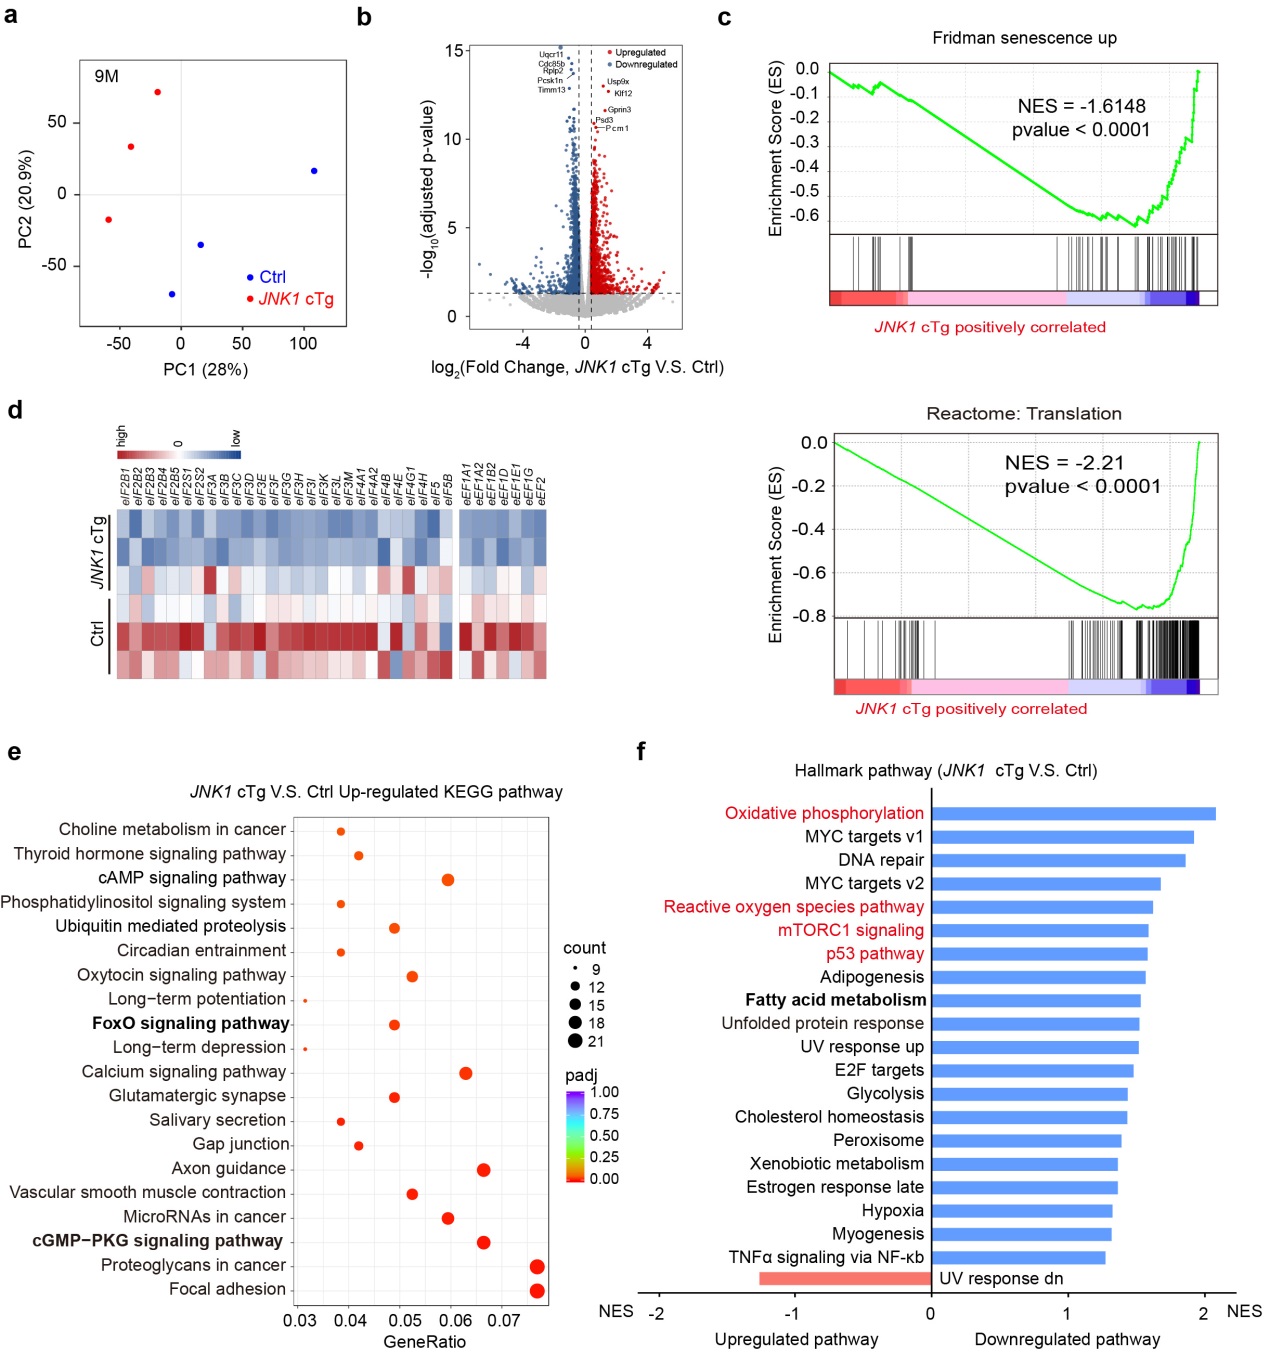
**

**Fig.S3 Global transcriptomeanalysisusing bulkRNA-seq in 9-month-old *JNK1* cTg and control mouse brains, related to Figure 4**

**a,** Principal component analysis (PCA) of RNA-seq in 9-month-old *JNK1* cTg and control mouse brains (each group n=3). **b,** Volcano plots of gene expression showing 860 upregulated and 1081 downregulated genes in RNA sequencing (RNA-seq) data from 9-month-old *JNK1* cTg and control mice brains. **c,** GSEArevealed significant downregulation of both the 'Fridman senescence up' signature and translation-related pathways in 9-month-old *JNK1* cTg mice compared to controls. **d,** Heatmap of genes associated with translation. **e,** KEGG enrichment analysis for the biological functions of upregulated genes in *JNK1* cTg mouse brains (FDR < 0.05, log2FC > 0.4). **f,** GSEA analysis shown that hallmark pathways including oxidative phosphorylation, reactive oxygen species, mTOR1, and p53 are downregulated in *JNK1* cTg mouse brains.

**
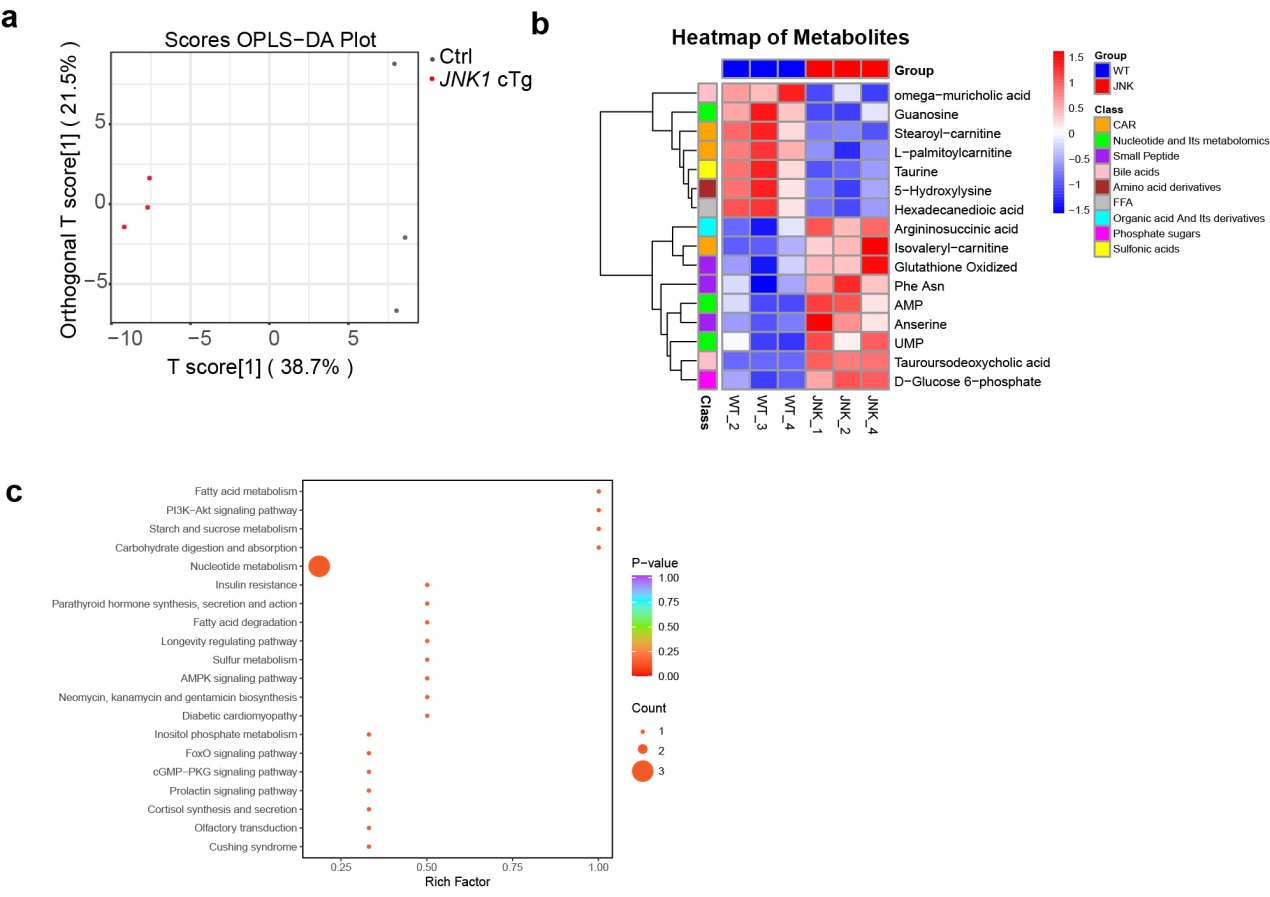
Fig.S4 Targeted metabolomics analysis of brain tissues in *JNK1* cTg and Ctrl mouse brains, related to Figure 5**

**(a)** Orthogonal partial least squares-discriminant analysis (OPLS-DA) score plot showing the separation between Ctrl and *JNK1* cTg mice. Each point represents an individual sample. **(b)** Heatmap of relative abundance of metabolites, grouped by class, in control (Ctrl) and *JNK1* cTg mice. Rows represent individual metabolites, and columns represent samples. Color intensity indicates normalized metabolite levels. Group and class annotations are provided. **(c)** Dot plot of significantly enriched KEGG pathways based on differential metabolites

**
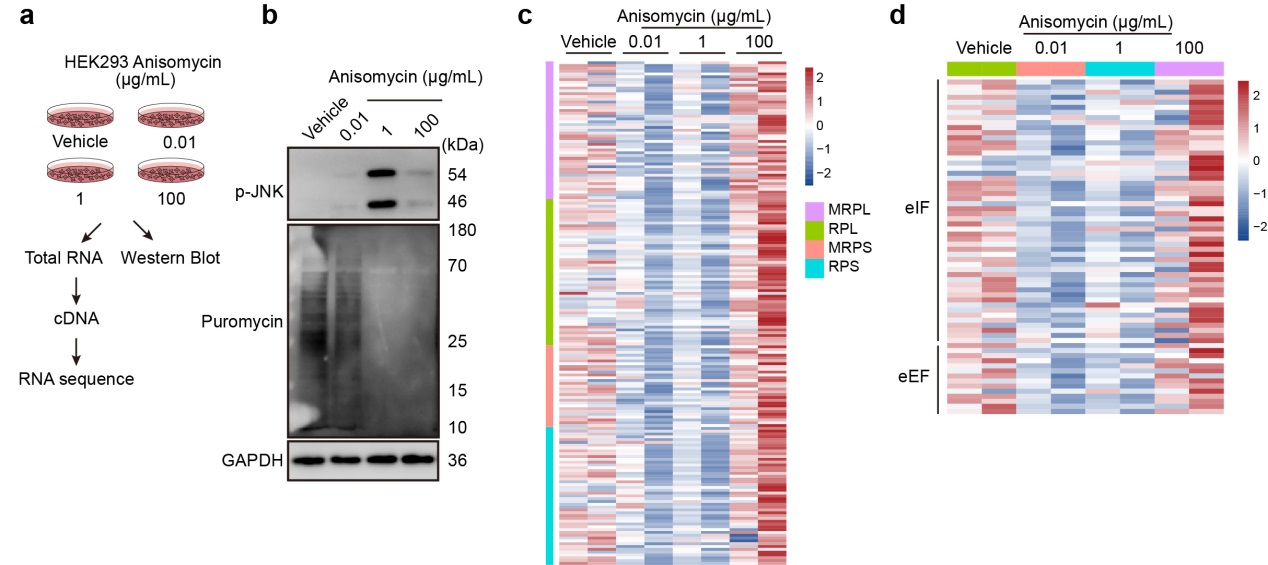
**

**Fig.S5 Low dosage of** **anisomycin treatment causes down-regulation of ribosome-associated genes in HEK293 cells**

**a,** Diagram of HEK293 cells were treated with different concentrations of anisomycin (ANS) and analyzed by bulk RNA-seq and Western blot. **b,** Immunoblots for phosphorylation of p-JNK and puromycin-based metabolic labeling of protein synthesis in HEK293 cells treated with ANS (0.001, 1, and 100 mg/L, 15 min) compared to vehicle. **c,** Heatmap of genes associated with ribosomal (RPL and RPS) and mitoribosmal (MRPL and MRPS) genes in HEK293 cells treated with different concentrations of ANS. **d,** Heatmap of genes associated with translation initiation factor (eIF) and (eEF).


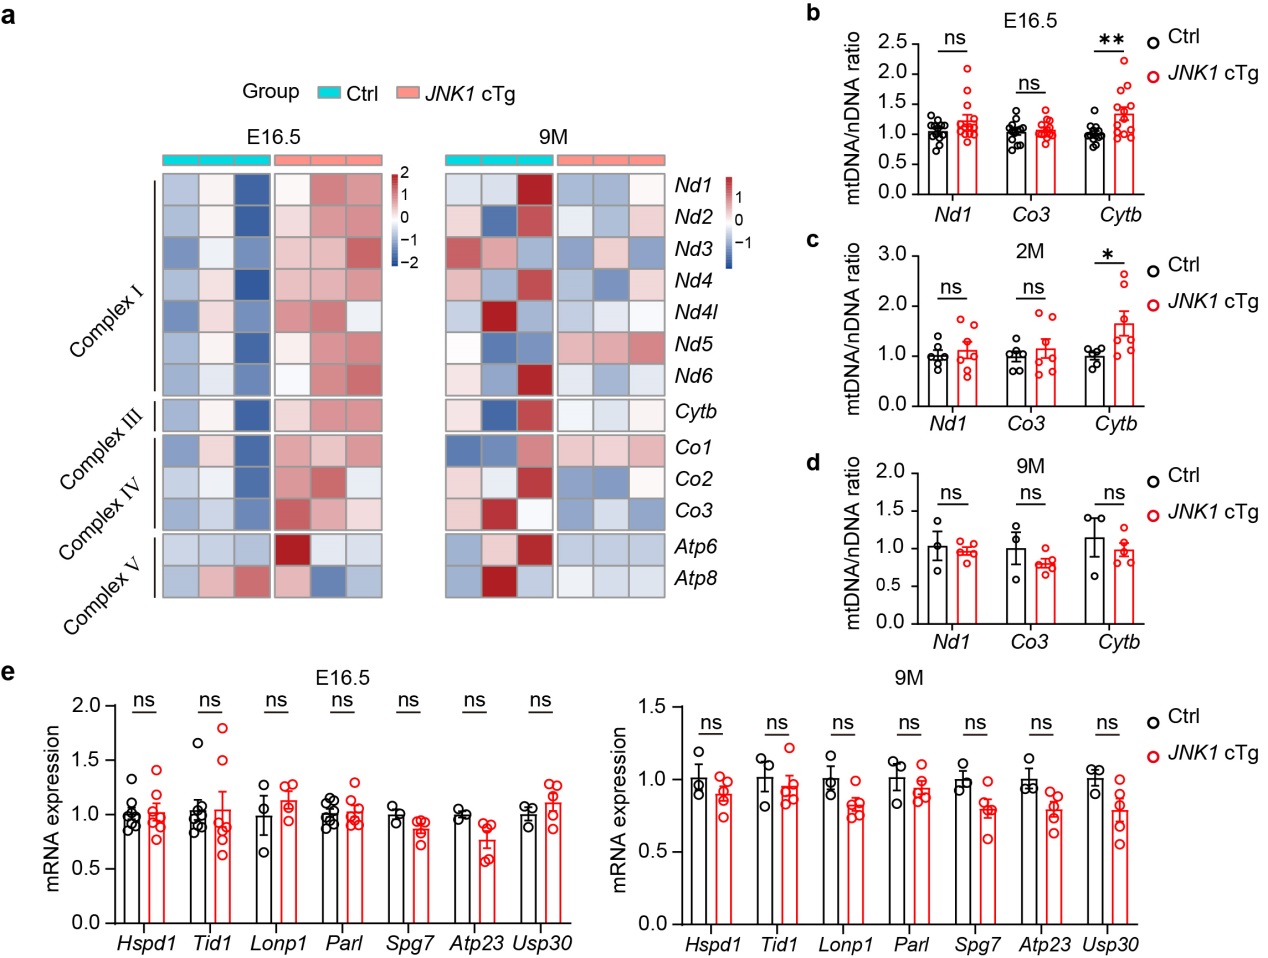


**Fig.S6 JNK activation** **didn’t induce** **mitochondrial unfolded protein response mtUPR response in different stages of *JNK1* cTg mouse brains**

**a,** Heatmap of mitochondrial-encoded OXPHOS genes in E16.5 and 9-month-old *JNK1* cTg and Ctrl mouse brains. **b-d,** RT-qPCR analysis of mtDNA/nDNA ratios by amplification DNA levels of *Nd1*, *Co3*, and *Cytb* normalized with the nuclear 18S gene in different stages of *JNK1* cTg and Ctrl mouse brains. **e,** RT-qPCR analysis indicated no significant change in the mRNA level of mitochondrial chaperon(*hspd1* and *Tid1*), and mitochondrial protease (*Lonp1*, *Parl*, *Spg7*, *Atp23*, and *Usp30*). All data are represented as mean ± SEM, n.s. *p* > 0.05, **p* < 0.05, ***p* < 0.01.

.

**Table S1 Comparative survival characteristics of JNK1CA cTg and WT mice.**

| **Genotype** | **Median** | **Mean s.e.m** | **Min-Max** | **Oldest 10%** | **Youngest 10%** | **N** |
| --- | --- | --- | --- | --- | --- | --- |
| **Ctrl** | 749 | 749±26 | 522-989 | 926±32 | 549±21 | 24 |
| ***JNK1* cTg** | 766 | 766±40 | 558-1079 | 1019±61 | 558±0 | 16 |

Lifespan is reported in days (±s.e.m, where appropriate) for Control and *JNK1*cTg male mice. The oldest (youngest) 10% are the mean lifespan of the longest (or shortest) living 10% of animals within a genotype. N = Sample size.

**Table S2 Primers for genotyping and QPCR analysis**

| **Primer** | **Sequence (5’-3’)** |
| --- | --- |
| Rosa 26 JNK1 P1 | AAAGTCGCTCTGAGTTGTTAT |
| Rosa 26 JNK1 P2  Rosa 26 JNK1 P3  Nestin Cre Forward  Nestin Cre Reverse  Mouse *Gapdh* QPCR-Forward  Mouse *Gapdh* QPCR-Reverse  Mouse *Jnk1* QPCR-Forward  Mouse *Jnk1* QPCR-Reverse  Mouse *Jnk2* QPCR-Forward  Mouse *Jnk2* QPCR-Reverse  Mouse *Jnk3* QPCR-Forward  Mouse *Jnk3* QPCR-Reverse  Mouse *Cdkn2a* QPCR-Forward  Mouse *Cdkn2a* QPCR-Reverse  Mouse *Cdkn2b* QPCR-Forward  Mouse *Cdkn2b* QPCR-Reverse  Mouse *Cdkn1a* QPCR-Forward  Mouse *Cdkn1a* QPCR-Reverse  Mouse *Trp53* QPCR-Forward  Mouse *Trp53* QPCR-Reverse  Mouse IL6-Forward  Mouse IL6-Reverse  Mouse IL1β-Forward  Mouse IL1β- Reverse  Mouse TNF-α-Forward  Mouse TNF-α-Reverse  Mouse Nd1-Forward  Mouse Nd1-Reverse  Mouse Co3-Forward  Mouse Co3-Reverse  Mouse Cytb-Forward  Mouse Cytb-Reverse  Mouse Hspd1-Forward  Mouse Hspd1-Reverse  Mouse Tid1-Forward  Mouse Tid1-Reverse  Mouse Lonp1-Forward  Mouse Lonp1-Reverse  Mouse Parl-Forward  Mouse Parl-Reverse  Mouse Spg7-Forward  Mouse Spg7-Reverse  Mouse Atp23-Forward  Mouse Atp23-Reverse  Mouse Usp30-Forward  Mouse Usp30-Reverse  Mouse *Rpl6* QPCR-Forward  Mouse *Rpl6* QPCR-Reverse  Mouse *Rplp2* QPCR-Forward  Mouse *Rplp2* QPCR-Reverse  Mouse *Rpl38* QPCR-Forward  Mouse *Rpl38* QPCR-Reverse  Mouse *Rps15* QPCR-Forward  Mouse *Rps15* QPCR-Reverse  Mouse *Rps28* QPCR-Forward  Mouse *Rps28* QPCR-Reverse  Mouse *Rps29* QPCR-Forward  Mouse *Rps29* QPCR-Reverse  Mouse *Mrpl12* QPCR-Forward  Mouse *Mrpl12* QPCR-Reverse  Mouse *Mrpl14* QPCR-Forward  Mouse *Mrpl14* QPCR-Reverse  Mouse *Mrpl41* QPCR-Forward  Mouse *Mrpl41* QPCR-Reverse  Mouse *Mrps5* QPCR-Forward  Mouse *Mrps5* QPCR-Reverse  Mouse *Mrps11* QPCR-Forward  Mouse *Mrps11* QPCR-Reverse  Mouse *Mrps26* QPCR-Forward  Mouse *Mrps26* QPCR-Reverse | GCGAAGAGTTTGTCCTCAACCGGAGCGGGAGAAATGGATATG  CGATGCAACGAGTGATGAGG  GCATTGCTGTCACTTGGTCGT  TGATGACATCAAGAAGGTGGTGAAG  TCCTTGGAGGCCATGTAGGCCAT  TCATTCTCGGCATGGGCTAC  AGCACATCGGGGAACAGTTT  CTGTTTGGTATGACCCCGCT  ACTGCTGCATCTGTGCTGAA  GGGAGCACACCATCGAAGAA  CGGTGGACATGGAGGAGATG  ACATCAAGACATCGTGCGATATT  CCAGCGGTACACAAAGACCA  GGCCTTGCAGGTCATGATGTT  GGAGCTAGGAAGCTGACCAC  TGTCCAATCCTGGTGATGTCC  CACGGGACCGAAGAGACAAC  TGAGGTTCGTGTTTGTGCCT  CTTCAGGTAGCTGGAGTGAGC  CCAAGAGGTGAGTGCTTCCC  CTGTTGTTCAGACTCTCTCCCT  GCAACTGTTCCTGAACTCAACT  ATCTTTTGGGGTCCGTCAACT  CCCTCACACTCAGATCATCTTCT  GCTACGACGTGGGCTACAG  TCCGAGCATCTTATCCACGC  GTATGGTGGTACTCCCGCTG  AAGGCCACCACACTCCTATT  ATCATGTGTTGGTACGAGGC  ACCTCAAAGCAACGAAGCCT  TGGGTGTTCTACTGGTTGGC  CACAGTCCTTCGCCAGATGAG  CTACACCTTGAAGCATTAAGGCT  GCTCGGGCATGGAAACTATCA  TCTGCACCCTGAATGTGACAA  CGGATGTGTTTCCTCACCTG  ACGCCAACATAGGGCTGTG  CCTATAAGAACACTCGTGAAGCC  ACCAGTCAGCTTTTATGCCATC  TTGCTATTGCGAATACTGACCC  CTGCTTCATCCTTGAGGTGTT  CTATGAAACACTCAGGTTGTGCT  GGTGAACCAGTGGACGTGA  CCTCCACTTTGCGAGCCTC  CAATCCCACCGATCACTCCC  AAGCCCAAGAAGGCGAAGC  GCAGCCGAGTATTTCCTTTTGTA  CGCTACGTCGCCTCTTACC  CTTGTTGAGCCGATCATCGTC  AGGATGCCAAGTCTGTCAAGA  TCCTTGTCTGTGATAACCAGGG  ACCTACCGTGGCGTAGACC  ATGTCCCTCAGGTGAGTCTTC  ATCAAGCTGGCTAGGGTAACC  GGCCTTTGACATTTCGGATGA  GTCTGATCCGCAAATACGGG  AGCCTATGTCCTTCGCGTACT  GCCACCGAAGGAGTGAAGC  GGAGCGTAAGGCTGGCAAT  CCATGTCAGCAGAGCATTCAG  GGGCGCTGTTGTCCACTAC  CTGACTGCCGTGACTCAAGG  GGACGACAAATTCTGGAACCA  AACCACTGTCTGACCAGCTTG  AGTCTCTGCTAATGCGCCTTT  CATGGAATGACCAGGTTTGTGG  AAAGGCTGAAGCGACTTGGAG  CATGACCCGCCTGCCAAAT  TCTCCCGGTACTGTCGGTAG |
